# Supplementary material
Source: ML conference proceedings conference paper supplement (https://openreview.net/forum?id=gaktiSjatl)
Supplement: supplementary_material [file attachment]

---

# Supplementary of "Semi-Implicit Denoising Diffusion Models (SIDDMs)"

---

Anonymous Author(s)

Affiliation

Address

email

## 1 S I. Derivation of Training Objective

2 Before getting the final training objective, we formulate the forward posterior following [1, 2]. Via  
3 Bayes' rule, we can rewrite the forward posterior given  $\mathbf{x}_0$ :

$$q(\mathbf{x}_{t-1}|\mathbf{x}_t, \mathbf{x}_0) = \frac{q(\mathbf{x}_t|\mathbf{x}_{t-1}, \mathbf{x}_0)q(\mathbf{x}_{t-1}|\mathbf{x}_0)}{q(\mathbf{x}_t|\mathbf{x}_0)} = \frac{q(\mathbf{x}_t|\mathbf{x}_{t-1})q(\mathbf{x}_{t-1}|\mathbf{x}_0)}{q(\mathbf{x}_t|\mathbf{x}_0)},$$

4 where all the components of the very right equation are forward diffusion and follow Gaussian  
5 distribution. Thus the forward posterior can be rewritten as Gaussian with mean and standard  
6 deviation as follows:

$$q(\mathbf{x}_{t-1}|\mathbf{x}_t, \mathbf{x}_0) = \mathcal{N}(\mathbf{x}_{t-1}; \tilde{\boldsymbol{\mu}}_t(\mathbf{x}_t, \mathbf{x}_0), \tilde{\boldsymbol{\beta}}_t \mathbf{I}).$$

7 Here we do not give redundant derivation and give the form of the forward posterior given  $x_t, x_0$ .

$$\tilde{\boldsymbol{\mu}}_t(\mathbf{x}_t, \mathbf{x}_0) := \frac{\sqrt{\bar{\alpha}_{t-1}}\beta_t}{1 - \bar{\alpha}_t}\mathbf{x}_0 + \frac{\sqrt{\alpha_t}(1 - \bar{\alpha}_{t-1})}{1 - \bar{\alpha}_t}\mathbf{x}_t \quad \text{and} \quad \tilde{\boldsymbol{\beta}}_t := \frac{1 - \bar{\alpha}_{t-1}}{1 - \bar{\alpha}_t}\beta_t.$$

8 And we parameterize our denoised  $x'_{t-1}$  given the predicted  $x'_0$  and the input  $x_t$  via simply replacing  
9 the  $x_0$  with the predicted  $x'_0$  in the above equation. Then, given the parameterized  $x'_{t-1}$ .

10 To get our final training objective, We can rewrite the distribution matching objective of Equation (7)  
11 as:

$$\begin{aligned} & \min_{\theta} \max_{D_{adv}} \mathbb{E}_{q(x_0)q(x_{t-1}|x_0)q(x_t|x_{t-1})} \left[ D_{adv}(q(x_{t-1})||p_{\theta}(x_{t-1})) \right. \\ & \quad \left. + \lambda_{AFD}[-H(p_{\theta}(x_t|x_{t-1})) + H(p_{\theta}(x_t|x_{t-1}), q(x_t|x_{t-1}))] \right] \\ & = \min_{\theta} \max_{D_{adv}, \psi} \mathbb{E}_{q(x_0)q(x_{t-1}|x_0)q(x_t|x_{t-1})} \left[ D_{adv}(q(x_{t-1})||p_{\theta}(x_{t-1})) \right. \\ & \quad \left. + \lambda_{AFD}[H(p_{\theta}(x_t|x_{t-1}), q(x_t|x_{t-1})) - H(p_{\theta}(x_t|x_{t-1}), p_{\psi}(x_t|x_{t-1}))] \right], \end{aligned}$$

12 where the first GAN matching objective can be written as:

$$\min_{\theta} \max_{D_{\phi}} \sum_{t \geq 0} \mathbb{E}_{q(x_0)q(x_{t-1}|x_0)q(x_t|x_{t-1})} [-\log(D_{\phi}(x_{t-1}, t))] + [-\log(1 - D_{\phi}(x'_{t-1}, t))].$$

13 In the first cross-entropy of our distribution matching objective, the  $q(x_t|x_{t-1})$  is the forward diffusion  
14 with the mean  $\sqrt{1 - \beta_t}x_{t-1}$  and variance  $\beta_t \mathbf{I}$ . Thus the likelihood can be written as:

$$H(p_{\theta}(x_t|x_{t-1}), q(x_t|x_{t-1})) = \mathbb{E}_{q(x_0)q(x_{t-1}|x_0)q(x_t|x_{t-1})} \frac{(1 - \beta_t) \|x'_{t-1} - x_{t-1}\|^2}{\beta_t},$$

15 To solve the second cross-entropy between the denoised distribution and the parameterized regression  
 16 model, we define  $p_\psi(x_t|x_{t-1}) := \mathcal{N}(x_t; \sqrt{1 - \beta_t}x_{t-1}, \beta_t \mathbf{I})$  as forward diffusion for the regression  
 17 model. And we also define  $x'_t$  are sampled from the  $x'_{t-1}$  via the forward diffusion. Similar to the  
 18 above likelihood of cross-entropy, we can write the following likelihood for the second cross-entropy  
 19 as follows:

$$H(p_\theta(x_t|x_{t-1}), p_\psi(x_t|x_{t-1})) = \mathbb{E}_{q(x_0)q(x_{t-1}|x_0)q(x_t|x_{t-1})} \frac{\|C_\psi(x'_{t-1}) - x'_t\|^2}{\beta_t},$$

20 Finally, we can get the final training objective of our proposed method.

$$\begin{aligned} \min_{\theta} \max_{D_\phi, C_\psi} \sum_{t>0} \mathbb{E}_{q(x_0)q(x_{t-1}|x_0)q(x_t|x_{t-1})} & \left[ -\log(D_\phi(x_{t-1}, t)) \right] + \left[ -\log(1 - D_\phi(x'_{t-1}, t)) \right] \\ & + \lambda_{AFD} \frac{(1 - \beta_t) \|x'_{t-1} - x_{t-1}\|^2 - \|C_\psi(x'_{t-1}) - x'_t\|^2}{\beta_t} \Big], \end{aligned}$$

21 In the main paper formulation, we mistakenly exchange the position of the  $\beta_t$  and  $1 - \beta_t$ , it is a typo,  
 22 we will correct it later.

## 23 S II. Derivation of Theorem 1

24 For simplicity, we denote  $q$  via  $Q$ ,  $p_\theta$  via  $P$  and  $x_{t-1}, x_t$  via  $X, Y$ . According to the triangle  
 25 inequality of total variation (TV) distance, we have

$$d_{TV}(Q_{XY}, P_{XY}) \leq d_{TV}(Q_{XY}, Q_{Y|X}P_X) + d_{TV}(Q_{Y|X}P_X, P_{XY}). \quad (\text{E11})$$

26 Using the definition of TV distance, we have

$$\begin{aligned} d_{TV}(Q_{Y|X}Q_X, Q_{Y|X}P_X) &= \frac{1}{2} \int |Q_{Y|X}(y|x)Q_X(x) - Q_{Y|X}(y|x)P_X(x)|\mu(x, y) \\ &\stackrel{(a)}{\leq} \frac{1}{2} \int |Q_{Y|X}(y|x)|\mu(x, y) \int |Q_X(x) - P_X(x)|\mu(x) \\ &\leq c_1 d_{TV}(Q_X, P_X), \end{aligned} \quad (\text{E12})$$

27 where  $P$  and  $Q$  are densities,  $\mu$  is a  $(\sigma$ -finite) measure,  $c_1$  is an upper bound of  
 28  $\frac{1}{2} \int |Q_{Y|X}(y|x)|\mu(x, y)$ , and (a) follows from the Hölder inequality.

29 Similarly, we have

$$d_{TV}(Q_{Y|X}P_X, P_{Y|X}P_X) \leq c_2 d_{TV}(Q_{Y|X}, P_{Y|X}), \quad (\text{E13})$$

30 where  $c_2$  is an upper bound of  $\frac{1}{2} \int |P_X(x)|\mu(x)$ . Combining (E11), (E12), and (E13), we have

$$d_{TV}(Q_{XY}, P_{XY}) \leq c_1 d_{TV}(Q_X, P_X) + c_2 d_{TV}(Q_{Y|X}, P_{Y|X}) \quad (\text{E14})$$

31 According to the Pinsker inequality  $d_{TV}(P, Q) \leq \sqrt{\frac{KL(P||Q)}{2}}$  [3], and the relation between TV and  
 32 JSD, i.e.,  $\frac{1}{2}d_{TV}(P, Q)^2 \leq JSD(P, Q) \leq 2d_{TV}(P, Q)$  [4], we can rewrite (E14) as

$$JSD(Q_{XY}, P_{XY}) \leq 2c_1 \sqrt{2JSD(Q_X, P_X)} + 2c_2 \sqrt{2KL(P_{Y|X}||Q_{Y|X})}. \quad (\text{E15})$$

## 33 S III. Societal impact

34 With the increasing utilization of generative models, our proposed SSIDMs will improve the diffusion-  
 35 based generative model while maintaining the highest level of generative quality. The incorporation  
 36 of SSIDMs enhances the capabilities of generative models, particularly in the domain of text-to-image  
 37 generation and editing. By integrating SSIDMs into the existing generative model framework, we  
 38 could unlock new possibilities for generating realistic and visually coherent images from textual  
 39 descriptions. One of the key advantages of our SSIDMs is their ability to accelerate the inference  
 40 process, even though our model takes more time and more resources to train because of the additional  
 41 adversarial training objectives. With faster inference, we eliminate the time-consuming barriers  
 42 previously associated with text-to-image generation. As a result, real-time applications of generative  
 43 models become feasible, enabling on-the-fly image generation or instant editing.

## 44 S IV. More Implementation Details

45 For the time steps, we apply the continuous time setup with the cosine noise schedule for all the  
 46 experiments. We also apply a similar network structure as [5] and the downsampling trick as [6],  
 47 where we put the downsampling layer at the beginning of each ResBlock. As mentioned, we design  
 48 the discriminator as UNet, which adopts the symmetric network structure as the generator. For  
 49 the regression model  $C_\psi$  and the discriminator regularizer, we share most of the layers with the  
 50 discriminator except that we put a different linear head for the marginal, conditional and regularizer  
 51 outputs. To be notified, the  $C_\psi$  only works on the denoised data, and the regularizer only works on  
 52 the sampled  $x_{t-1}$  from the real data via forward diffusion. By this design, our model does not bring  
 53 obvious extra overhead than our baseline DDGANs, which only has two more linear head in the final  
 54 output for the discriminator network. We also describe the detailed model hyperparameters in the  
 55 following table. We train all the models until they converges to the best FID score.

|                       | CIFAR10 32 | CelebA-HQ 256 | ImageNet 64 |
|-----------------------|------------|---------------|-------------|
| Resolution            | 32         | 256           | 64          |
| Conditional on labels | False      | False         | True        |
| Diffusion steps       | 4          | 2             | 4           |
| Noise Schedule        | cosine     | cosine        | cosine      |
| Channels              | 256        | 192           | 256         |
| Depth                 | 2          | 2             | 2           |
| Channels multiple     | 2,2,2      | 1,1,2,3,4     | 1,2,3,4     |
| Heads                 | 4          | 4             | 4           |
| Heads Channels        | 64         | 64            | 64          |
| Attention resolution  | 16,8       | 32,16,8       | 32,16,8     |
| Dropout               | 0.1        | 0.1           | 0.1         |
| Batch size            | 256        | 128           | 2048        |
| Learning Rate of G    | 2e-4       | 2e-4          | 2e-4        |
| Learning Rate of D    | 1e-4       | 1e-4          | 1e-4        |
| EMA Rate of G         | 0.9999     | 0.9999        | 0.9999      |

Table 1: Hyperparameters for our SSIDMs on different datasets.

## 56 S V. More Generated Results

### 57 References

- 58 [1] Jonathan Ho, Ajay Jain, and Pieter Abbeel. Denoising diffusion probabilistic models. In  
 59 H. Larochelle, M. Ranzato, R. Hadsell, M.F. Balcan, and H. Lin, editors, *Advances in Neural*  
 60 *Information Processing Systems*, volume 33, pages 6840–6851. Curran Associates, Inc., 2020.
- 61 [2] Zhisheng Xiao, Karsten Kreis, and Arash Vahdat. Tackling the generative learning trilemma with  
 62 denoising diffusion GANs. In *International Conference on Learning Representations*, 2022.
- 63 [3] Alexandre B. Tsybakov. *Introduction to Nonparametric Estimation*. Springer Publishing Com-  
 64 pany, Incorporated, 1st edition, 2008.
- 65 [4] Kiran K Thekumparampil, Ashish Khetan, Zinan Lin, and Sewoong Oh. Robustness of condi-  
 66 tional gans to noisy labels. In *NeurIPS*, pages 10271–10282. Curran Associates, Inc., 2018.
- 67 [5] Prafulla Dhariwal and Alexander Quinn Nichol. Diffusion models beat GANs on image synthesis.  
 68 In A. Beygelzimer, Y. Dauphin, P. Liang, and J. Wortman Vaughan, editors, *Advances in Neural*  
 69 *Information Processing Systems*, 2021.
- 70 [6] Chitwan Saharia, William Chan, Saurabh Saxena, Lala Li, Jay Whang, Emily Denton, Seyed  
 71 Kamyar Seyed Ghasemipour, Raphael Gontijo-Lopes, Burcu Karagol Ayan, Tim Salimans,  
 72 Jonathan Ho, David J. Fleet, and Mohammad Norouzi. Photorealistic text-to-image diffusion  
 73 models with deep language understanding. In Alice H. Oh, Alekh Agarwal, Danielle Belgrave,  
 74 and Kyunghyun Cho, editors, *Advances in Neural Information Processing Systems*, 2022.

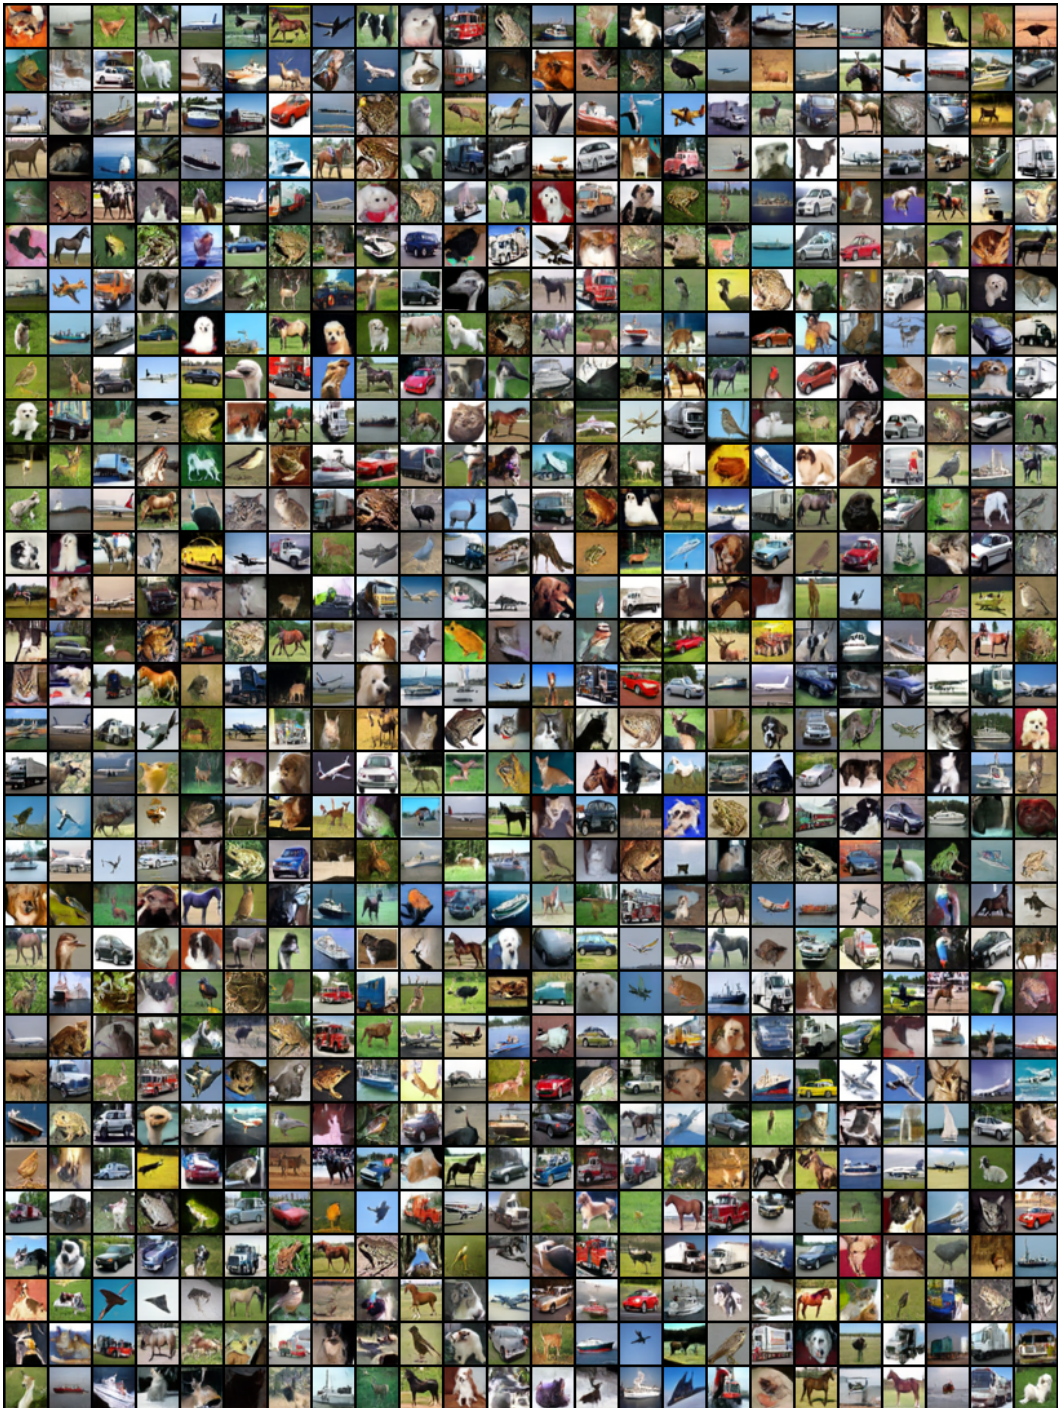

Figure 1: Randomly generated samples from our model. We randomly sample 768 images from the generated images from CIFAR10, which we used to produce our paper results



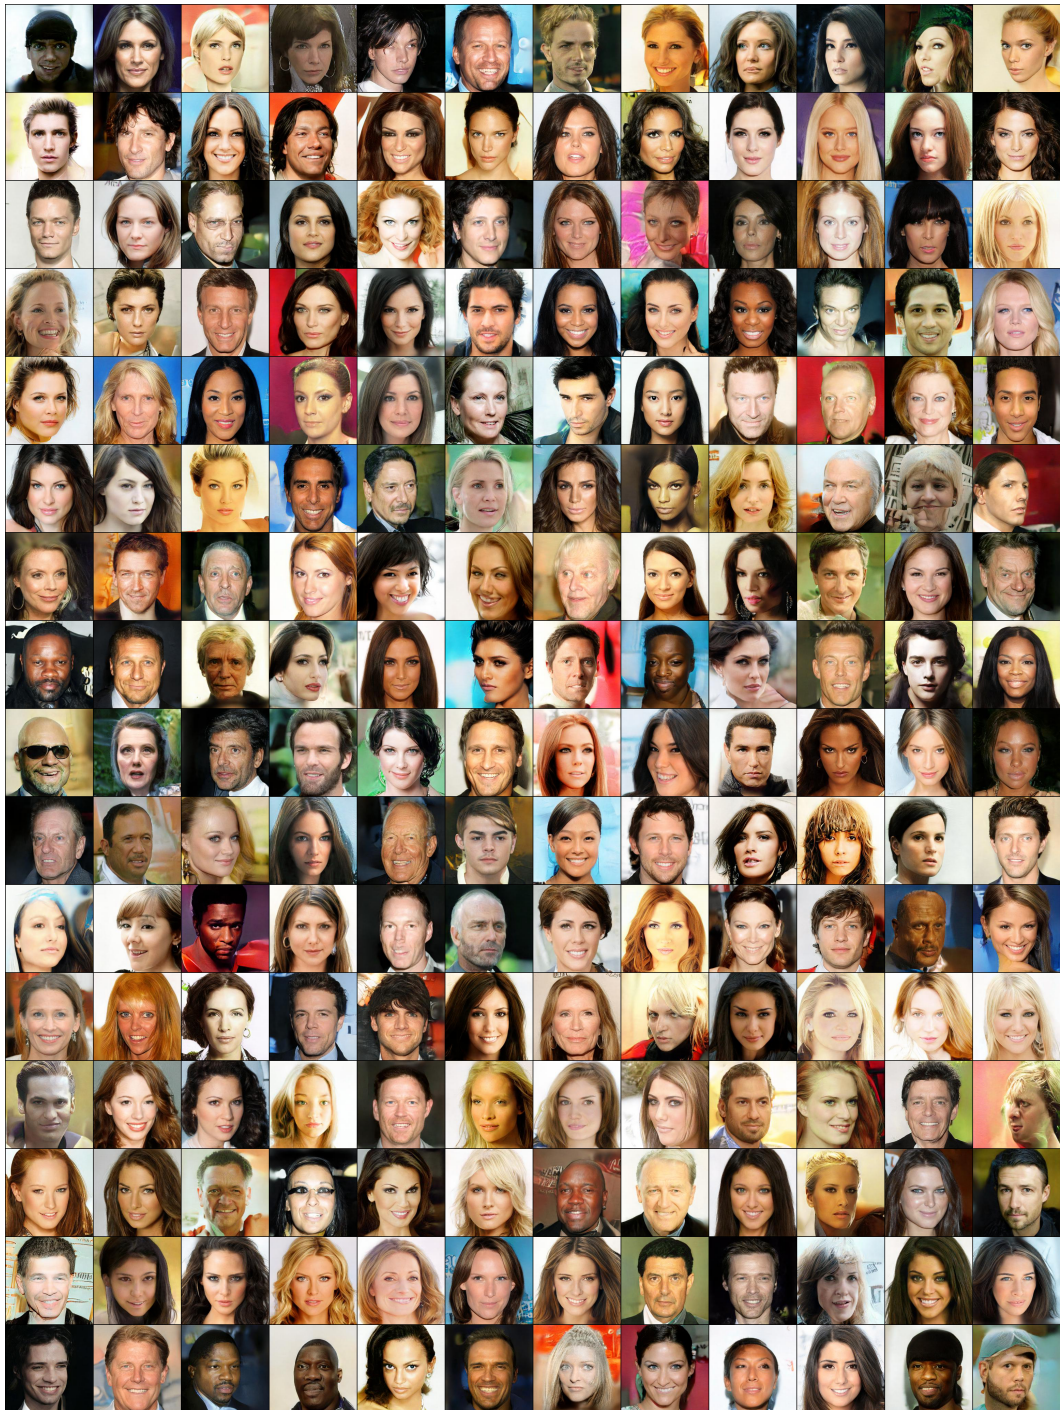

Figure 2: Randomly generated samples from our model. We randomly sample 192 images from the generated images from CelebHQ 256, which we used to produce our paper results



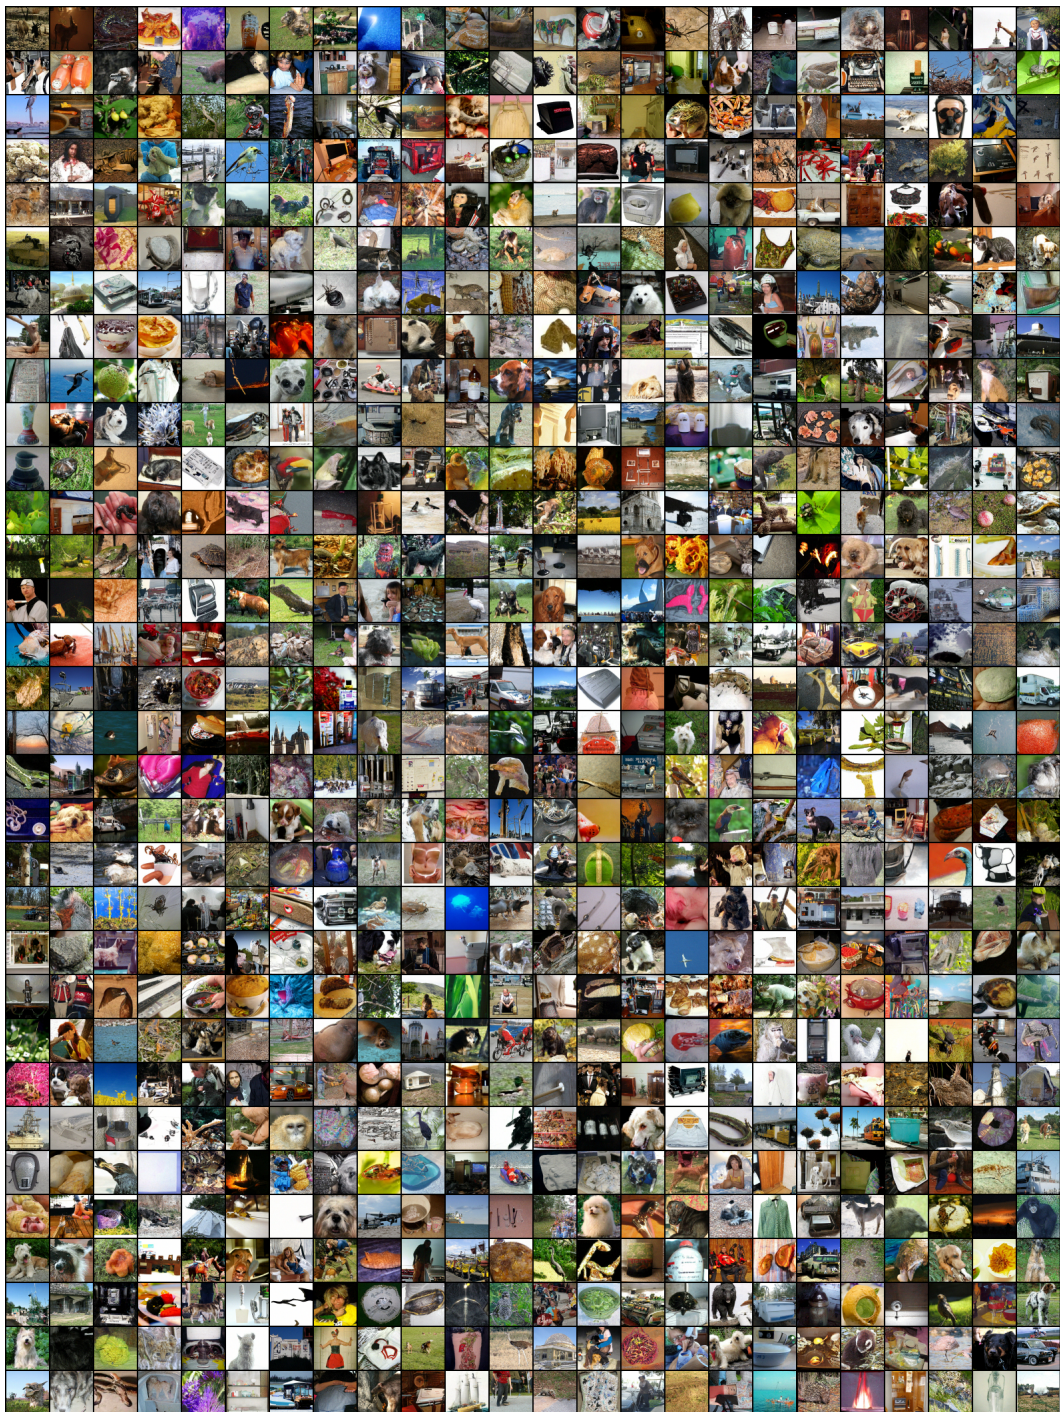

Figure 3: Randomly generated samples from our model. We randomly sample 768 images from the generated images from Imagenet 64, which we used to produce our paper results
